# Supplementary material for: miR-142-3p encapsulated in T lymphocyte-derived tissue small extracellular vesicles induces Treg function defect and thyrocyte destruction in Hashimoto’s thyroiditis
Source: Springer Nature journal article supplement (doi:10.1186/s12916-023-02914-7), 2023-06-06

**Table S1.** The baseline demographics and clinical characteristics of enrolled subjects.

| Variables                | Testing set       |                  |                  | Validation set   |                  |                  |
|--------------------------|-------------------|------------------|------------------|------------------|------------------|------------------|
|                          | HT (n=10)         | Normal (n=10)    | P value          | HT (n=30)        | Normal (n=30)    | P value          |
| Age (years)              | 47.5 ± 11.6       | 47.1 ± 11.9      | 0.532            | 47.1 ± 11.2      | 46.4 ± 12.1      | 0.127            |
| Sex (male/female)        | 4/6               | 4/6              | -                | 9/21             | 9/21             | -                |
| BMI (kg/m <sup>2</sup> ) | 23.1 ± 2.8        | 22.9 ± 2.1       | 0.216            | 23.4 ± 3.4       | 23.1 ± 2.7       | 0.178            |
| TSH (mIU/L)              | 2.8 (0.7-3.8)     | 2.4 (1.2-3.6)    | 0.187            | 2.2 (0.1-6.6)    | 2.0 (0.2-5.4)    | 0.467            |
| FT3 (pmol/L)             | 4.2 (3.7-4.5)     | 4.3 (3.5-4.3)    | 0.623            | 4.7 (3.4-7.5)    | 4.5 (3.2-5.3)    | 0.381            |
| FT4 (pmol/L)             | 15.1 (14.2-17.1)  | 15.4 (13.9-18.4) | 0.327            | 15.2 (12.8-33.0) | 15.2 (10.9-23.4) | 0.169            |
| TgAb (IU/mL)             | 209.5 (58.1-4000) | 38.9 (11.2-112)  | <b>&lt;0.001</b> | 253 (115-2298)   | 13.5 (10.1-73.4) | <b>&lt;0.001</b> |
| TPOAb (IU/mL)            | 187.5 (60.2-600)  | 17.6 (9.0-32)    | <b>&lt;0.001</b> | 204 (44-600)     | 9 (9-16.2)       | <b>&lt;0.001</b> |

HT: Hashimoto thyroiditis; BMI: body mass index; TSH: thyroid stimulating hormone; FT3: free T3; FT4: free T4; TgAb: thyroglobulin antibody; TPOAb: thyroperoxidase antibody.

**Table S2.** Univariate and multiple analysis for difference miRNAs.

| miRNAs      | Univariate          |               | Multivariate        |               |
|-------------|---------------------|---------------|---------------------|---------------|
|             | OR (95%CI)          | P value       | OR (95%CI)          | P value       |
| miR-142-3p  | 1.613 (1.185-2.195) | <b>0.002*</b> | 1.437 (1.016-2.032) | <b>0.040*</b> |
| miR-146a-5p | 1.649 (1.176-2.311) | <b>0.004*</b> | 1.372 (0.965-1.951) | 0.078         |

CI: confidence interval; OR: Odds ratio; \*statistically significant difference.

**Figure S1. The uncropped original western blots from main figures.**

**Fig 1C**

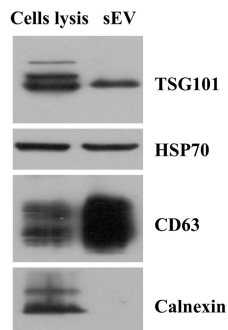

**Fig 2E**

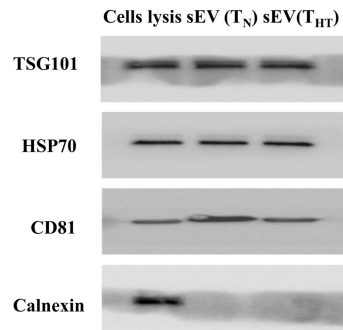

**Fig 3B**

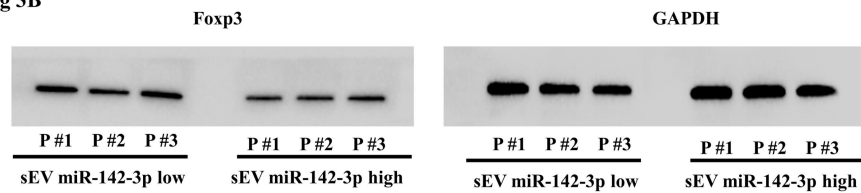

**Fig 5D**

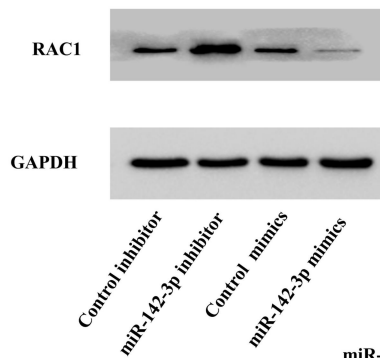

**Fig 5I**

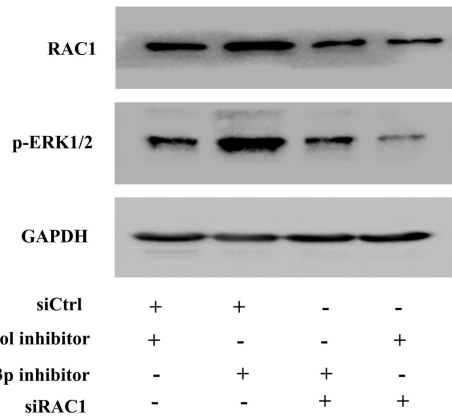

**Fig 6F**

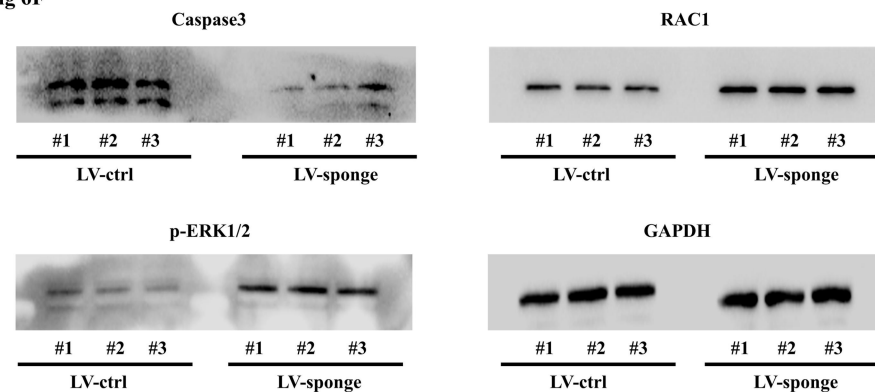

**Figure S2. The lowest RNA concentration of tissue sEV total RNA and levels of tissue sEV miR-103a-3p**

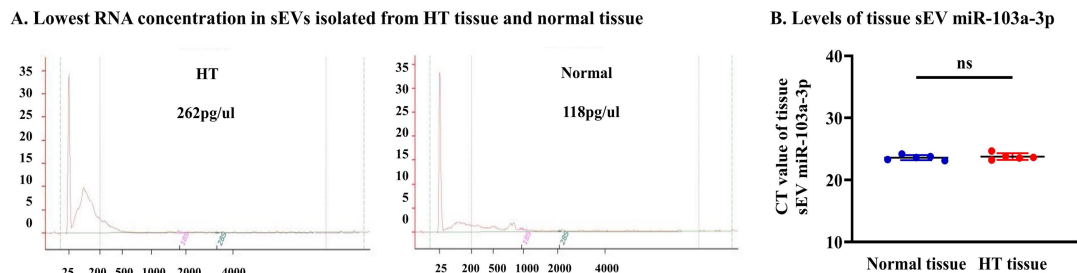

**Figure S3. Tissue sEVs isolated from HT patients promotes apoptosis of thyrocyte cells which can be prevented by miR-142-3p inhibitor**

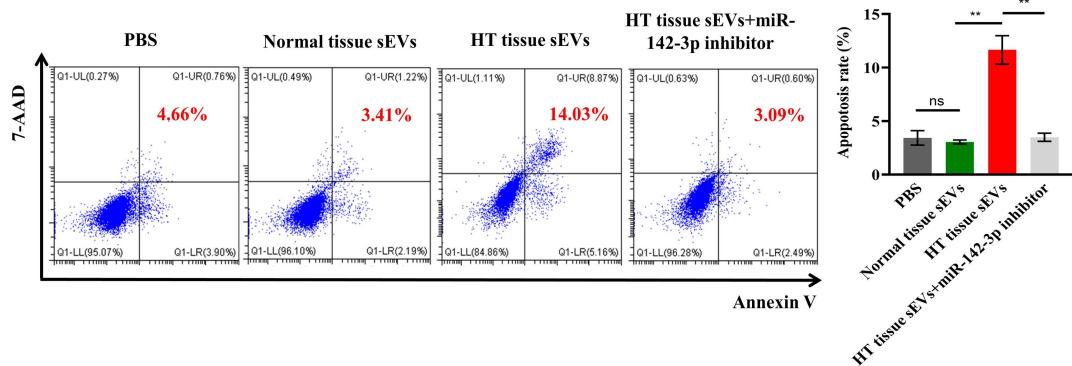

**Figure S4. Biological function enrichment analysis and validation of tissue sEV miRNAs**

**A. Heatmap across 20 tissue samples**

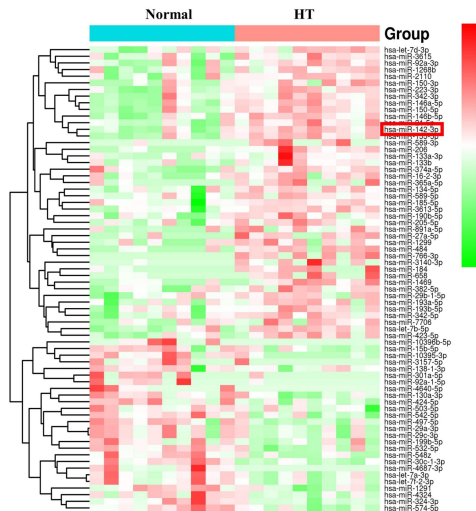

**B. KEGG enrichment**

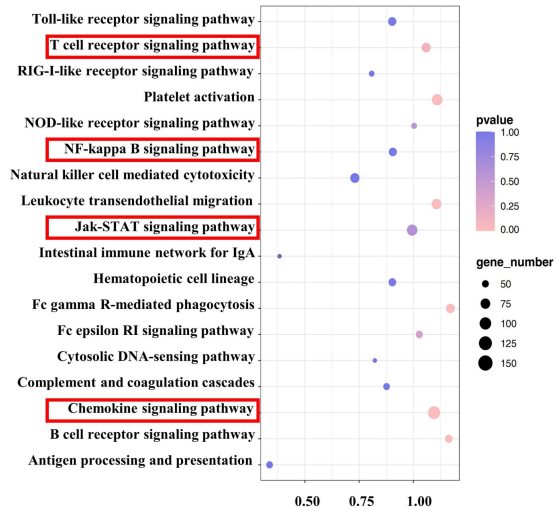

**C. GO enrichment**

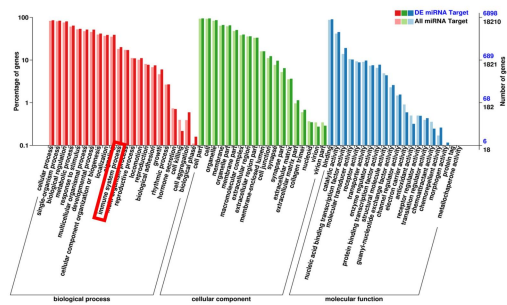

**D. Validation of tissue sEV miRNAs**

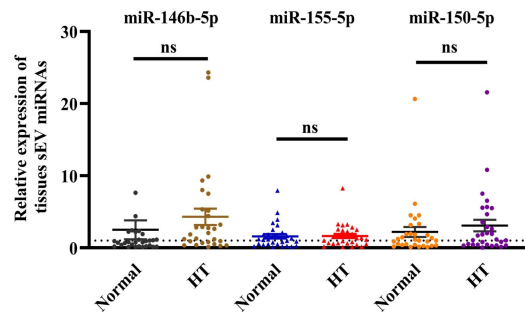

**E. Association of tissue sEV miR-142-3p with thyroid function**

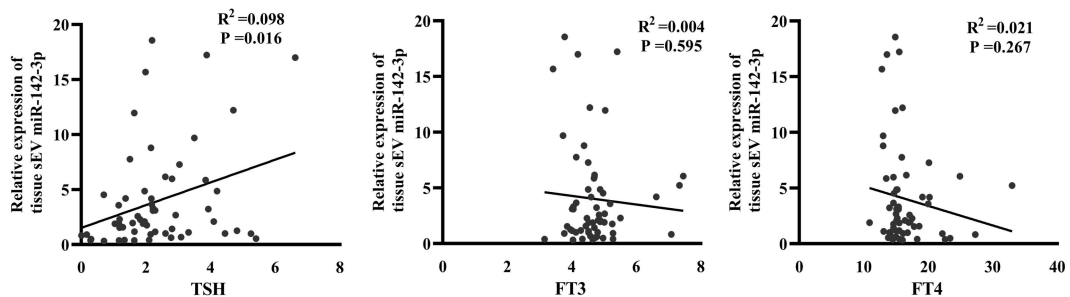

**Figure S5. The levels of miR-142-3p in specific immune cell types and T lymphocyte-derived sEV**

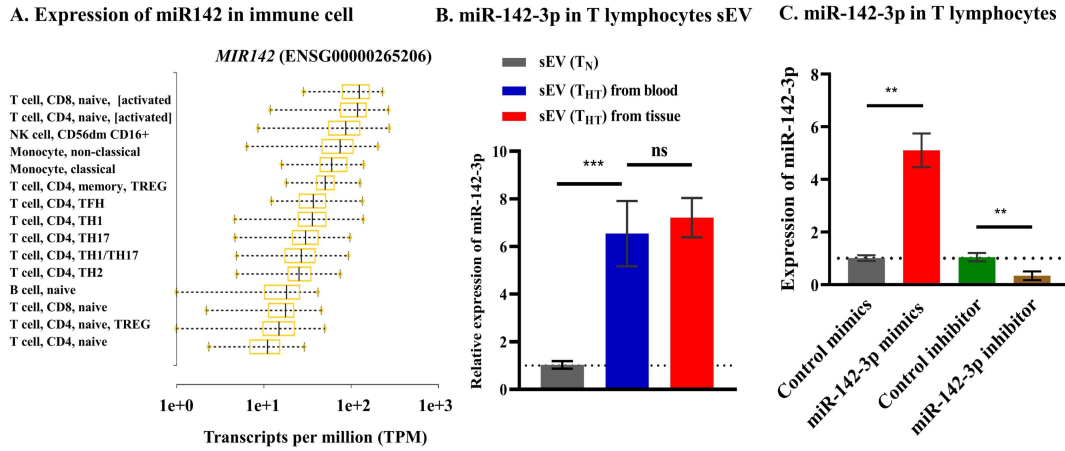

**Figure S6. The miR-142-3p levels after transfection with mimics or inhibitor in thyrocyte cells, T lymphocyte migration and the effect of miR-142-3p on CXCL10 secretion**

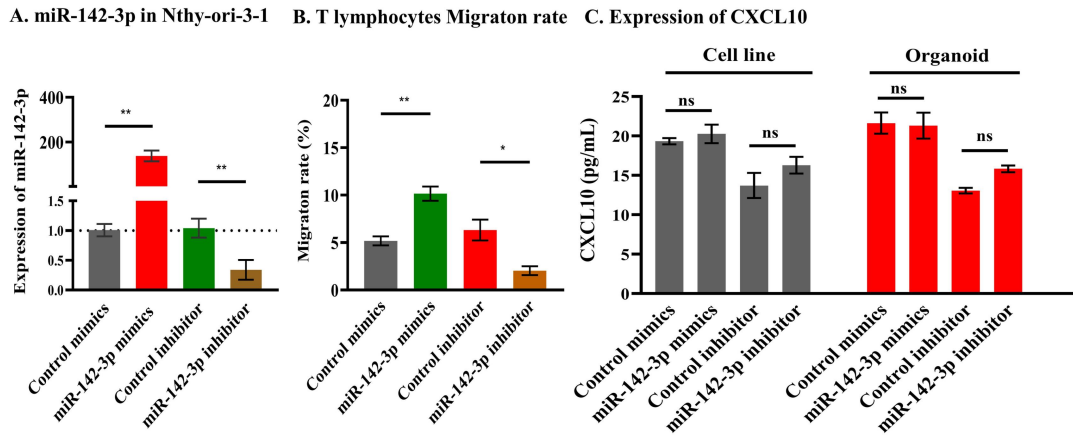

**Figure S7. Predicted target and inhibition efficiency of siRNA for RAC1**

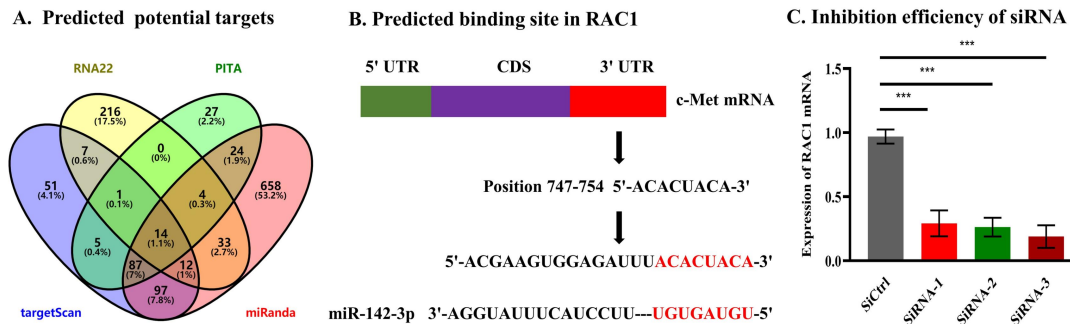

Supplement: MOESM1 [file 25455642]
