# Supplementary material for: miR-142-3p encapsulated in T lymphocyte-derived tissue small extracellular vesicles induces Treg function defect and thyrocyte destruction in Hashimoto’s thyroiditis
Source: Springer Nature journal article supplement (doi:10.1186/s12916-023-02914-7), 2023-06-06
Supplement: MOESM3 [file 25455642]

| ID               | N-01      | N-02      | N-03      | N-04      | N-05      | N-06      | N-07      | N-08      | N-09      | N-10      | HT-1      | HT-2      | HT-3      | HT-4      | HT-5      | HT-6      | HT-7      | HT-8      | HT-9      | HT-10     | PValue    | FDR       | log2FC    | regulated |
|------------------|-----------|-----------|-----------|-----------|-----------|-----------|-----------|-----------|-----------|-----------|-----------|-----------|-----------|-----------|-----------|-----------|-----------|-----------|-----------|-----------|-----------|-----------|-----------|-----------|
| hsa-miR-155-5p   | 108.06036 | 139.82305 | 73.517484 | 125.99715 | 136.86374 | 2872.9222 | 637.38219 | 86.226719 | 63.83157  | 874.88339 | 695.92366 | 2298.1221 | 1010.3878 | 2669.762  | 1761.2512 | 4284.5559 | 667.80579 | 1119.0917 | 330.40855 | 2279.5132 | 0.0038862 | 0.4111802 | 3.4538692 | up        |
| hsa-miR-150-5p   | 877.9904  | 1019.744  | 323.4079  | 639.9905  | 620.9768  | 41399.623 | 6052.407  | 847.89607 | 889.6525  | 3136.1205 | 10284.098 | 5763.1033 | 4072.8463 | 26768.096 | 8324.5994 | 24869.053 | 9561.9343 | 7573.6302 | 3183.2043 | 9550.1354 | 0.0038862 | 0.4111802 | 3.3380231 | up        |
| hsa-miR-142-3p   | 224.22524 | 421.8799  | 97.678159 | 125.37186 | 100.66837 | 1908.2474 | 622.85496 | 57.484479 | 118.35437 | 1027.082  | 678.62169 | 1645.6707 | 935.50284 | 3076.0302 | 1488.3813 | 3928.4227 | 1753.4565 | 1181.4946 | 499.64219 | 2451.2384 | 0.0020892 | 0.3501717 | 3.164264  | up        |
| hsa-miR-146a-5p  | 1314.2841 | 1779.1279 | 1023.3772 | 1198.6925 | 984.0616  | 11374.119 | 3146.9611 | 1523.3387 | 1009.3367 | 4009.9685 | 6039.3485 | 5253.4706 | 3574.3585 | 8896.4431 | 7971.1089 | 14004.252 | 4281.0455 | 5100.3958 | 3439.4724 | 6290.1269 | 0.0020892 | 0.3501717 | 1.992651  | up        |
| hsa-miR-146b-5p  | 148.58299 | 306.16427 | 80.075381 | 97.85883  | 170.7969  | 862.17812 | 355.91712 | 459.87583 | 121.01402 | 1137.8661 | 473.88172 | 1932.6104 | 894.14847 | 986.65119 | 1370.5511 | 1331.3901 | 684.59421 | 488.8226  | 394.87851 | 1193.7669 | 0.0020892 | 0.3501717 | 1.9794025 | up        |
| hsa-miR-133a-3p  | 55.380933 | 16.875196 | 13.460948 | 10.317385 | 10.179948 | 33.160697 | 7.2636147 | 71.855599 | 29.256136 | 15.530474 | 38.448821 | 14.759379 | 24.589083 | 5839.0681 | 128.16617 | 43.831774 | 42.903724 | 35.361635 | 51.575968 | 52.625456 | 0.035463  | 0.5953116 | 1.4203763 | up        |
| hsa-miR-342-3p   | 1267.0077 | 1632.0725 | 1057.8924 | 1063.6286 | 978.40607 | 13659.192 | 3243.204  | 2069.4413 | 1787.284  | 2643.2867 | 4112.1014 | 3592.6064 | 2173.8985 | 10270.707 | 4760.753  | 9308.7729 | 4435.872  | 3240.7899 | 2736.7498 | 4686.4354 | 0.005196  | 0.4111802 | 1.3218576 | up        |
| hsa-miR-223-3p   | 688.88478 | 354.37911 | 232.28764 | 212.28801 | 268.07195 | 1486.2021 | 664.62075 | 359.27799 | 414.9052  | 772.38226 | 792.04571 | 633.78509 | 552.13668 | 1685.1837 | 1451.1718 | 1265.6425 | 554.01765 | 1002.6064 | 958.99066 | 944.48845 | 0.0146896 | 0.5953116 | 1.2978918 | up        |
| hsa-miR-374a-5p  | 105.35885 | 48.214845 | 34.515251 | 27.825674 | 20.359895 | 18.087653 | 14.527229 | 14.37112  | 18.617541 | 52.803613 | 26.914175 | 32.991552 | 53.648908 | 39.383136 | 72.35187  | 54.789717 | 39.172965 | 37.441731 | 54.799466 | 55.395217 | 0.0432571 | 0.5953116 | 0.9491266 | up        |
| hsa-miR-382-5p   | 12.15679  | 16.875196 | 32.789488 | 30.326858 | 27.146527 | 9.0438264 | 9.0795184 | 43.113359 | 49.203502 | 23.813394 | 26.914175 | 52.960124 | 21.236026 | 111.93102 | 53.747103 | 60.268689 | 24.249931 | 31.201443 | 48.35247  | 49.855695 | 0.0232306 | 0.5953116 | 0.9646799 | up        |
| hsa-miR-21-5p    | 2197.6775 | 1998.5053 | 1243.5845 | 1339.3841 | 1217.0693 | 3035.7111 | 1810.456  | 646.70039 | 807.20339 | 4343.356  | 1954.1613 | 5009.9409 | 2625.4434 | 2663.5437 | 4671.8636 | 9495.058  | 2742.1076 | 3155.5059 | 2029.192  | 6700.0515 | 0.005196  | 0.4111802 | 0.9048527 | up        |
| hsa-miR-193a-5p  | 85.097531 | 26.518165 | 63.162909 | 58.77828  | 105.19279 | 57.277567 | 108.95422 | 43.113359 | 806.38595 | 82.829197 | 71.130318 | 94.199564 | 136.35764 | 126.44059 | 134.36776 | 153.41121 | 83.942069 | 141.44654 | 58.022964 | 138.48804 | 0.0185434 | 0.5953116 | 0.8370997 | up        |
| hsa-miR-423-5p   | 456.55501 | 296.5213  | 367.58742 | 309.20889 | 434.34443 | 741.59376 | 483.03038 | 574.84479 | 742.042   | 364.44847 | 421.97581 | 621.6303  | 833.79345 | 1131.747  | 737.98907 | 1123.1892 | 669.67117 | 969.32482 | 472.24246 | 875.24443 | 0.0089307 | 0.542909  | 0.8190671 | up        |
| hsa-miR-92a-3p   | 729.40741 | 677.41858 | 419.70545 | 450.83844 | 469.40869 | 1633.918  | 935.1904  | 287.4224  | 1372.3788 | 534.24832 | 845.87406 | 638.56018 | 941.09126 | 1204.2948 | 950.91029 | 1840.9345 | 1128.5545 | 1329.1815 | 847.77998 | 1202.0762 | 0.0432571 | 0.5953116 | 0.7792191 | up        |
| hsa-let-7d-3p    | 183.70261 | 183.21641 | 104.58121 | 106.61297 | 234.13879 | 177.86192 | 292.36049 | 143.7112  | 280.59294 | 176.01204 | 276.83151 | 210.5382  | 255.95    | 165.82373 | 359.69215 | 323.25933 | 333.9029  | 320.33481 | 386.81976 | 296.36441 | 0.005196  | 0.4111802 | 0.7722552 | up        |
| hsa-let-7b-5p    | 40688.777 | 46336.877 | 49741.653 | 53020.102 | 43005.754 | 48001.616 | 61214.113 | 64741.895 | 85169.932 | 45043.553 | 53542.867 | 74181.072 | 76326.749 | 67005.223 | 80688.872 | 76333.034 | 67370.039 | 76329.129 | 55856.774 | 75293.179 | 0.005196  | 0.4111802 | 0.6128277 | up        |
| hsa-miR-130a-3p  | 815.8557  | 600.27482 | 391.74809 | 403.31594 | 561.02822 | 244.18331 | 350.46941 | 316.16464 | 243.35786 | 689.55306 | 619.02601 | 316.45844 | 296.18668 | 107.78542 | 159.17411 | 142.45326 | 264.88386 | 193.44895 | 349.74953 | 254.818   | 0.0232306 | 0.5953116 | -0.613387 | down      |
| hsa-let-7a-3p    | 22.962826 | 81.965237 | 17.257625 | 12.505921 | 10.179948 | 15.073044 | 19.974941 | 86.226719 | 18.617541 | 27.954854 | 19.22441  | 9.5501862 | 6.7061135 | 14.509576 | 22.739159 | 5.4789717 | 9.3268965 | 14.560673 | 24.176235 | 8.3092826 | 0.035463  | 0.5953116 | -0.681697 | down      |
| hsa-let-7f-2-3p  | 22.962826 | 72.322268 | 16.912473 | 10.942681 | 10.179948 | 15.073044 | 19.974941 | 86.226719 | 18.617541 | 26.919489 | 16.340749 | 9.1160869 | 6.7061135 | 14.509576 | 20.671963 | 5.4789717 | 9.3268965 | 14.560673 | 20.952737 | 8.3092826 | 0.0185434 | 0.5953116 | -0.695149 | down      |
| hsa-miR-15b-5p   | 726.7059  | 641.25744 | 737.5909  | 700.64421 | 764.62717 | 955.63099 | 604.69593 | 287.4224  | 462.77888 | 750.6396  | 703.61342 | 614.25061 | 347.60022 | 679.87729 | 537.47103 | 427.35979 | 373.07586 | 359.85664 | 448.06622 | 387.76652 | 0.0232306 | 0.5953116 | -0.705282 | down      |
| hsa-miR-29c-3p   | 26400.496 | 23885.634 | 17204.472 | 11849.047 | 15612.646 | 32307.562 | 11158.728 | 18337.549 | 6767.4762 | 20615.152 | 18489.077 | 9314.0362 | 8901.248  | 12244.01  | 10757.689 | 8267.7683 | 14796.189 | 5855.4708 | 17564.841 | 8445.0009 | 0.035463  | 0.5953116 | -0.824361 | down      |
| hsa-miR-324-3p   | 14.858299 | 21.69668  | 23.47037  | 16.570345 | 22.622106 | 72.350611 | 39.949881 | 172.45344 | 35.905258 | 27.954854 | 29.797836 | 13.89118  | 14.529913 | 14.509576 | 16.53757  | 5.4789717 | 16.788414 | 12.480577 | 16.11749  | 13.848804 | 0.0015047 | 0.3501717 | -0.82446  | down      |
| hsa-miR-29a-3p   | 25627.864 | 22943.034 | 16619.093 | 11278.465 | 14995.063 | 31436.341 | 10661.171 | 17618.993 | 6522.7885 | 19502.134 | 17754.704 | 8710.638  | 8478.7629 | 11570.351 | 10087.918 | 7314.4272 | 14327.978 | 5360.4079 | 16736.402 | 7871.6604 | 0.035463  | 0.5953116 | -0.86498  | down      |
| hsa-miR-199b-5p  | 2635.322  | 5732.7424 | 1797.5542 | 1453.8133 | 1729.46   | 847.10507 | 1027.8015 | 4340.0782 | 855.07707 | 2106.9677 | 1081.3731 | 760.108   | 606.90327 | 945.19526 | 1418.0967 | 679.39249 | 1788.8988 | 728.03366 | 3529.7303 | 612.11715 | 0.0288056 | 0.5953116 | -1.048419 | down      |
| hsa-miR-532-5p   | 471.41331 | 520.72033 | 248.16465 | 280.75792 | 256.7609  | 476.30819 | 368.62845 | 617.95815 | 337.77539 | 301.29122 | 400.82896 | 167.99646 | 97.238646 | 167.89653 | 146.77094 | 153.41121 | 294.72993 | 149.76693 | 460.96022 | 160.64613 | 0.0068415 | 0.5953116 | -1.104412 | down      |
| hsa-miR-497-5p   | 624.04856 | 443.57658 | 347.56857 | 254.49549 | 476.19532 | 437.11828 | 350.46941 | 229.93792 | 106.38595 | 469.02033 | 341.23328 | 194.04242 | 127.41616 | 172.04212 | 146.77094 | 186.28504 | 193.99945 | 114.40529 | 296.56182 | 177.2647  | 0.005196  | 0.4111802 | -1.115288 | down      |
| hsa-miR-424-5p   | 316.07654 | 318.21798 | 461.12375 | 276.0682  | 594.96138 | 147.71583 | 148.9041  | 244.30904 | 128.99296 | 565.30927 | 155.71772 | 118.07503 | 214.59563 | 68.402288 | 225.32439 | 120.53738 | 179.07641 | 108.165   | 149.89266 | 83.092826 | 0.0068415 | 0.4640462 | -1.130694 | down      |
| hsa-miR-542-5p   | 179.65034 | 173.57344 | 64.198366 | 72.53434  | 98.40616  | 141.68661 | 103.50651 | 502.98919 | 106.38595 | 60.051168 | 137.45453 | 24.309565 | 79.355677 | 45.601526 | 138.50215 | 16.436915 | 55.961379 | 33.281539 | 46.740721 | 13.848804 | 0.0068415 | 0.4640462 | -1.184588 | down      |
| hsa-miR-4324     | 29.716598 | 9.6429691 | 30.373421 | 14.694457 | 42.982001 | 39.189914 | 12.711326 | 186.82456 | 33.245609 | 32.096314 | 28.836616 | 11.720683 | 15.647598 | 12.43678  | 14.470374 | 5.4789717 | 22.384552 | 8.3203847 | 24.176235 | 11.079043 | 0.0114962 | 0.5953116 | -1.215168 | down      |
| hsa-miR-574-5p   | 21.612071 | 21.69668  | 26.23159  | 19.071529 | 39.588685 | 30.146088 | 52.661207 | 114.96896 | 47.873677 | 57.980438 | 26.914175 | 22.573167 | 12.294541 | 31.091949 | 14.470374 | 5.4789717 | 11.192276 | 8.3203847 | 17.729239 | 11.079043 | 0.0028795 | 0.40211   | -1.381535 | down      |
| hsa-miR-30c-1-3p | 13.507545 | 55.447072 | 11.390033 | 14.381809 | 23.753211 | 21.102262 | 23.606748 | 71.855599 | 34.575434 | 17.601204 | 5.7673231 | 8.6819875 | 6.7061135 | 14.509576 | 12.403178 | 5.4789717 | 9.3268965 | 6.2402886 | 4.835247  | 13.848804 | 0.0003248 | 0.3501717 | -1.53875  | down      |
| hsa-miR-1291     | 31.067353 | 38.571876 | 71.446569 | 533.37752 | 289.56295 | 201.97879 | 101.69061 | 488.61807 | 626.34728 | 46.591423 | 115.34646 | 130.22981 | 35.765939 | 31.091949 | 2.0671963 | 5.4789717 | 20.519122 | 91.524232 | 124.10467 | 11.079043 | 0.0288056 | 0.5953116 | -2.183332 | down      |
